# Supplementary material for: Biologically inspired, catechol-coordinated, hierarchical organization of raspberry-like calcium phosphate nanospheres with high specific surface area
Source: Royal Society of Chemistry journal article supplement (doi:10.1039/c7tb03156d), 2018-01-01
Supplement: c7tb03156d1.pdf [file c7tb03156d1.pdf]

## Supporting Information

### Biologically-Inspired, Catechol-Coordinated, Hierarchical Organization of Raspberry-like Calcium Phosphate Nanospheres with High Specific Surface Area

Xiaomin Ma<sup>a</sup>, Zhe Sun<sup>a</sup>, Wen Su<sup>a</sup>, Zeng Yi<sup>a</sup>, Xinxing Cui<sup>a</sup>, Bo Guo<sup>\*b</sup> and Xudong Li<sup>\*a</sup>

<sup>a</sup> National Engineering Research Center for Biomaterials, Sichuan University, Chengdu 610064, P R China

<sup>b</sup> Department of Ophthalmology, West China Hospital, Sichuan University, Chengdu 610041, P R China

\*Corresponding author: guobohx@163.com; xli20004@yahoo.com.

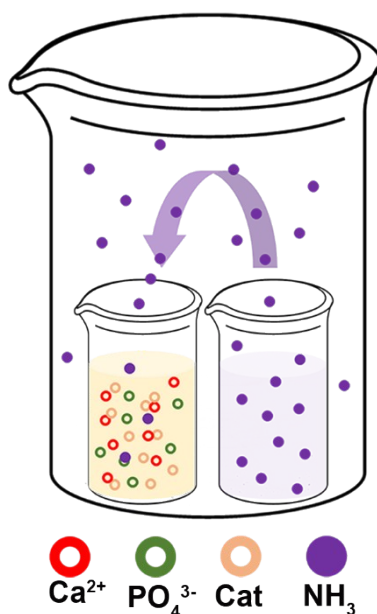

**Figure S1.** The diagrammatic sketch of the preparation of Control CaP, CaP/Cat 0.2~CaP/Cat 2.0 samples by ammonia diffusion method.

**Table S1.** Key Parameters of Samples. Control CaP, CaP/Cat-0.2, CaP/Cat-0.5, CaP/Cat-1.0 and CaP/Cat-2.0. (\*We give the approximate productivity dividing the obtained mass by the theoretical yield 20.08 mg.)

| CaP/Cat Nanospheres | Concentration of catechol (% w/v) | Concentration of Ca <sup>2+</sup> (mM) | Concentration of H <sub>2</sub> PO <sub>4</sub> <sup>4-</sup> (mM) | Yield (mg) | Productivity* (%) | Zeta potential (mV) | Size (nm) |
|---------------------|-----------------------------------|----------------------------------------|--------------------------------------------------------------------|------------|-------------------|---------------------|-----------|
| <b>Control CaP</b>  | 0                                 | 2                                      | 1.2                                                                | 14.8       | 73.70             | +0.4                | /         |
| <b>CaP/Cat-0.2</b>  | 0.2                               | 2                                      | 1.2                                                                | 12.8       | 63.74             | -11.8               | 189.3     |
| <b>CaP/Cat-0.5</b>  | 0.5                               | 2                                      | 1.2                                                                | 10.5       | 52.29             | -14.0               | 262.7     |
| <b>CaP/Cat-1.0</b>  | 1.0                               | 2                                      | 1.2                                                                | 7.2        | 35.86             | -14.6               | 312.4     |
| <b>CaP/Cat-2.0</b>  | 2.0                               | 2                                      | 1.2                                                                | 3.2        | 15.94             | -10.1               | 331.5     |

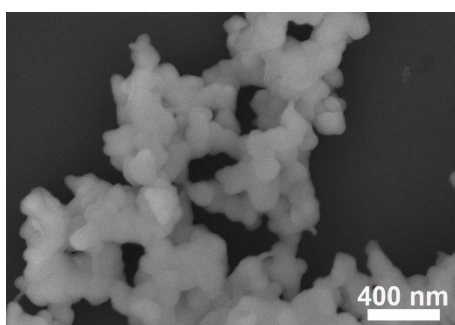

**Figure S2.** The SEM image of the Control CaP.

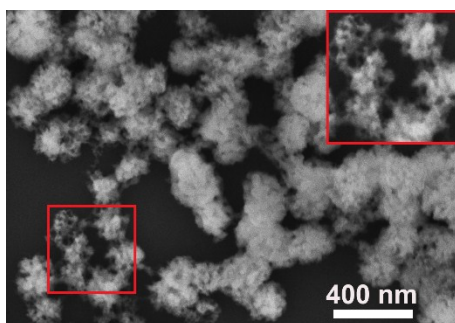

**Figure S3.** The SEM image of CaP/Cat-2.0. (the top right inset is the magnified view of the area marked by red square in the bottom left )

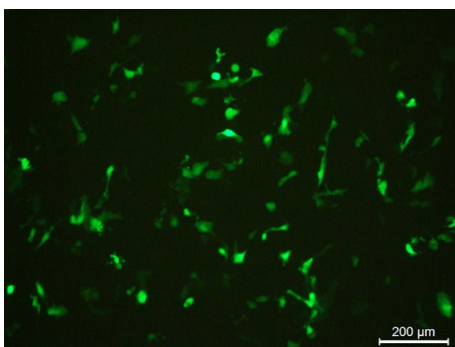

**Figure S4.** The EGFP fluorescence microscopy images of MG63 cells transfected with PEI<sub>25k</sub> nanospheres (Transfected cells appear green as a whole).

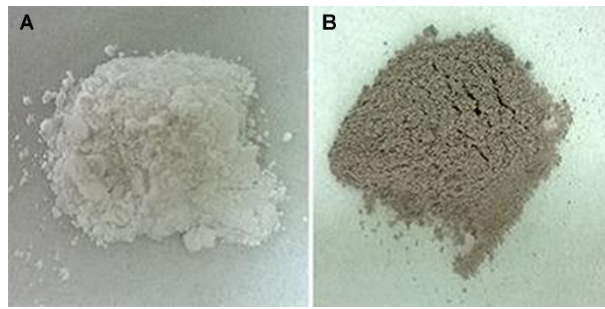

**Figure S5.** The digital images of the powder of CaP. (A) Control CaP, (B) CaP/Cat-1.0.
